# Supplementary material for: A novel photo- and hydrochromic europium metal–organic framework with good anion sensing properties
Source: Royal Society of Chemistry journal article supplement (doi:10.1039/c7tc03013d), 2017-01-01
Supplement: c7tc03013d1.pdf [file c7tc03013d1.pdf]

**Novel Photo- and Hydrochromic Europium Metal–Organic Framework with  
Highly Sensing Property for Anions**

Chenghui Zhang, Libo Sun, Yan Yan, Huaizhong Shi, Bolun Wang, Zhiqiang Liang\*  
and Jiyang Li\*

State Key Laboratory of Inorganic Synthesis and Preparative Chemistry,  
College of Chemistry, Jilin University, Changchun 130012, P. R. China.

### Determination of the detection limit

Detection limit of **1'** for  $\text{Cr}_2\text{O}_7^{2-}$  and  $\text{CrO}_4^{2-}$  anions was determined according to the following definitions:

$$S_b = \sqrt{\frac{\sum_{i=1}^n (x - \bar{x})^2}{n - 1}} \quad (1)$$

$$S = \frac{\Delta I}{\Delta c} \quad (2)$$

$$DL = \frac{3s_b}{S} \quad (3)$$

Firstly, the standard deviation ( $s_b$ ) was calculated by measuring the fluorescence intensity of the hybrid film in pure water for more than 10 times and then got the average intensity. By fitting the data into equation 1, the value of standard deviation ( $S_b$ ) was obtained. Secondly, a certain amount of analyte was added into the solvent and the resulting variation of the intensity ( $\Delta I$ ) was recorded. By fitting the data into equation 2, where  $\Delta I$  is the variation of intensity, and  $\Delta c$  is the variation of quencher concentration, the value of precision  $S$  was calculated. Finally the detection limit,  $DL$ , was calculated according to Function 3.

**Table S1** Crystal data and structure refinements for **1**.

|                                                                                         |                                                                  |
|-----------------------------------------------------------------------------------------|------------------------------------------------------------------|
| compound                                                                                | <b>1</b>                                                         |
| formula                                                                                 | C <sub>36</sub> EuO <sub>17</sub> N <sub>4</sub> H <sub>40</sub> |
| <i>fw</i>                                                                               | 1013.86                                                          |
| temp (K)                                                                                | 293(2) K                                                         |
| wavelength (Å)                                                                          | 0.71073                                                          |
| Crystal system                                                                          | Triclinic                                                        |
| space group                                                                             | <i>P</i> -1                                                      |
| <i>a</i> (Å)                                                                            | 9.7352(5)                                                        |
| <i>b</i> (Å)                                                                            | 14.1265(7)                                                       |
| <i>c</i> (Å)                                                                            | 14.9366(8)                                                       |
| <i>V</i> (Å <sup>3</sup> )                                                              | 1810.23(16)                                                      |
| <i>Z</i>                                                                                | 2                                                                |
| <i>F</i> (000)                                                                          | 875                                                              |
| $\theta$ range (deg)                                                                    | 1.54 to 26.30                                                    |
| reflections collected/unique                                                            | 11642 / 7338                                                     |
| <i>R</i> <sub>int</sub>                                                                 | 0.0155                                                           |
| data / restraints / params                                                              | 7338 / 0 / 412                                                   |
| GOF on <i>F</i> <sup>2</sup>                                                            | 1.069                                                            |
| <i>R</i> <sub>1</sub> , <i>wR</i> <sub>2</sub> <sup>a</sup> [ <i>I</i> >2σ( <i>I</i> )] | 0.0402, 0.1100                                                   |
| <i>R</i> <sub>1</sub> , <i>wR</i> <sub>2</sub> (all data)                               | 0.0434, 0.1124                                                   |

<sup>a</sup>  $R_1 = \sum ||F_o| - |F_c|| / \sum |F_o|$ .  $wR_2 = [\sum [w (F_o^2 - F_c^2)^2] / \sum [w (F_o^2)^2]]^{1/2}$

**Table S2** Selected bond lengths [Å] and angles [°] for **1**.

|                     |            |                    |            |
|---------------------|------------|--------------------|------------|
| Eu(1)-O(5)#1        | 2.3279(16) | Eu(1)-O(7)         | 2.4312(17) |
| Eu(1)-O(8)          | 2.3373(15) | Eu(1)-O(2)#2       | 2.4438(15) |
| Eu(1)-O(4)          | 2.4083(17) | Eu(1)-O(10)        | 2.4771(18) |
| Eu(1)-O(1)          | 2.4199(18) | Eu(1)-O(9)         | 2.5006(16) |
| O(5)-Eu(1)#3        | 2.3278(16) | O(1)-Eu(1)-O(2)#2  | 74.19(5)   |
| O(5)#1-Eu(1)-O(4)   | 72.91(6)   | O(5)#1-Eu(1)-O(8)  | 118.75(6)  |
| O(8)-Eu(1)-O(4)     | 73.59(6)   | O(7)-Eu(1)-O(2)#2  | 118.52(5)  |
| O(5)#1-Eu(1)-O(1)   | 145.66(6)  | O(5)#1-Eu(1)-O(10) | 78.78(6)   |
| O(8)-Eu(1)-O(1)     | 78.91(6)   | O(8)-Eu(1)-O(10)   | 73.55(6)   |
| O(4)-Eu(1)-O(1)     | 141.17(5)  | O(4)-Eu(1)-O(10)   | 117.52(5)  |
| O(5)#1-Eu(1)-O(7)   | 134.34(6)  | O(1)-Eu(1)-O(10)   | 78.95(6)   |
| O(4)-Eu(1)-O(7)     | 75.43(6)   | O(7)-Eu(1)-O(10)   | 146.12(6)  |
| O(8)-Eu(1)-O(7)     | 81.61(6)   | O(2)#2-Eu(1)-O(10) | 71.48(5)   |
| O(1)-Eu(1)-O(7)     | 73.87(6)   | O(5)#1-Eu(1)-O(9)  | 72.43(6)   |
| O(5)#1-Eu(1)-O(2)#2 | 74.12(6)   | O(8)-Eu(1)-O(9)    | 148.64(7)  |
| O(8)-Eu(1)-O(2)#2   | 139.09(7)  | O(4)-Eu(1)-O(9)    | 83.42(6)   |
| O(4)-Eu(1)-O(2)#2   | 142.85(6)  | O(1)-Eu(1)-O(9)    | 108.66(6)  |
| O(7)-Eu(1)-O(9)     | 72.00(6)   | O(2)#2-Eu(1)-O(9)  | 70.66(6)   |
| O(10)-Eu(1)-O(9)    | 137.24(6)  | C(37)-O(1)-Eu(1)   | 127.44(13) |
| C(37)-O(2)-Eu(1)#2  | 138.50(12) | C(39)-O(4)-Eu(1)   | 133.66(15) |
| C(38)-O(5)-Eu(1)#3  | 132.13(14) | C(40)#4-O(8)-Eu(1) | 166.26(18) |

Symmetry transformations used to generate equivalent atoms:

#1 x+1, y, z      #2 -x+2, -y+1, -z+2

#3 x-1, y, z      #4 -x+1, -y+1, -z+1

**Table S3** Comparison among various MOF sensors for Cr(VI) detection.

| Fluorescent Materials                                                        | analyte        | Quenching Constant ( $K_{SV}$ , $M^{-1}$ ) | Detection Limits ( $\mu M$ ) | Ref.      |
|------------------------------------------------------------------------------|----------------|--------------------------------------------|------------------------------|-----------|
| $[Zn(2-NH_2bdc)(bibp)]_n$                                                    | $Cr_2O_7^{2-}$ | 6555070                                    |                              | 13a       |
| $[Eu_7(mtb)_5(H_2O)_{16}] \cdot NO_3 \cdot 8DMA \cdot 18 H_2O$               | $CrO_4^{2-}$   | $3.3 \times 10^4$                          | 0.011                        | 13f       |
| $\{[Tb_4(BPDC)_4(3-OH)_4(H_2O)_8] \cdot 11H_2O\}_n$                          | $Cr_2O_7^{2-}$ | $1.13 \times 10^4$                         | 0.1                          | 13e       |
| $\{[Tb_4Mn(BPDC)_3(3-OH)_4(HCOO)_{1.5}(H_2O)_4] \cdot 2.5OH \cdot 8H_2O\}_n$ | $Cr_2O_7^{2-}$ | $5 \times 10^3$                            | 0.1                          | 13e       |
| $[Zn(btz)]_n$                                                                | $Cr_2O_7^{2-}$ | $4.23 \times 10^3$                         | 2                            | 13b       |
|                                                                              | $CrO_4^{2-}$   | $3.19 \times 10^3$                         | 20                           |           |
| $[Zn_2(ttz)H_2O]_n$                                                          | $Cr_2O_7^{2-}$ | $2.19 \times 10^3$                         | 20                           | 13b       |
|                                                                              | $CrO_4^{2-}$   | $2.35 \times 10^3$                         | 20                           |           |
| $\{[Eu_2L_{1.5}(H_2O)_2EtOH] \cdot DMF\}_n$                                  | $Cr_2O_7^{2-}$ | $1.53 \times 10^3$                         | 10                           | 13g       |
| $NH_2-Zn-MOF$                                                                | $Cr_2O_7^{2-}$ | $7.59 \times 10^3$                         | 3.9                          | 13c       |
|                                                                              | $CrO_4^{2-}$   | $4.45 \times 10^3$                         | 4.8                          |           |
| $\{[Cd(L)(BPDC)] \cdot 2H_2O\}_n$                                            | $Cr_2O_7^{2-}$ | $6.4 \times 10^3$                          | 37.6                         | 13d       |
| $\{[Cd(L)(SDBA)(H_2O)] \cdot 0.5H_2O\}_n$                                    | $Cr_2O_7^{2-}$ | $4.97 \times 10^3$                         | 48.6                         | 13d       |
| $[Zn(IPA)(L)]_n$                                                             | $Cr_2O_7^{2-}$ | $1.37 \times 10^3$                         | 12.02                        | 13h       |
|                                                                              | $CrO_4^{2-}$   | $1.00 \times 10^3$                         | 18.33                        |           |
| $[Cd(IPA)(L)]_n$                                                             | $Cr_2O_7^{2-}$ | $2.91 \times 10^3$                         | 2.26                         | 13h       |
|                                                                              | $CrO_4^{2-}$   | $1.3 \times 10^3$                          | 2.52                         |           |
| $[Eu(ipbp)_2(H_2O)_3] \cdot Br \cdot 6H_2O$                                  | $Cr_2O_7^{2-}$ | $8.98 \times 10^3$                         | 5.16                         | this work |
|                                                                              | $CrO_4^{2-}$   | $7.08 \times 10^3$                         | 5.82                         |           |

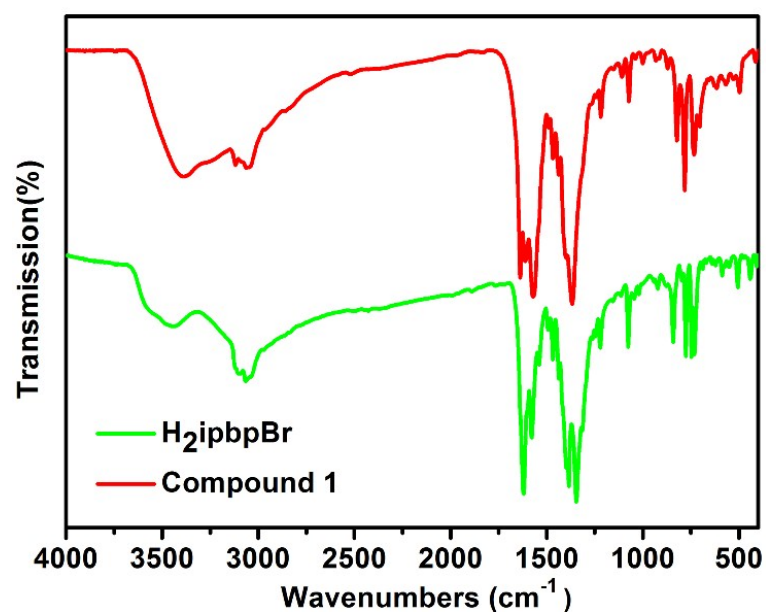

Fig. S1 IR spectra of H<sub>2</sub>ipbpBr and 1.

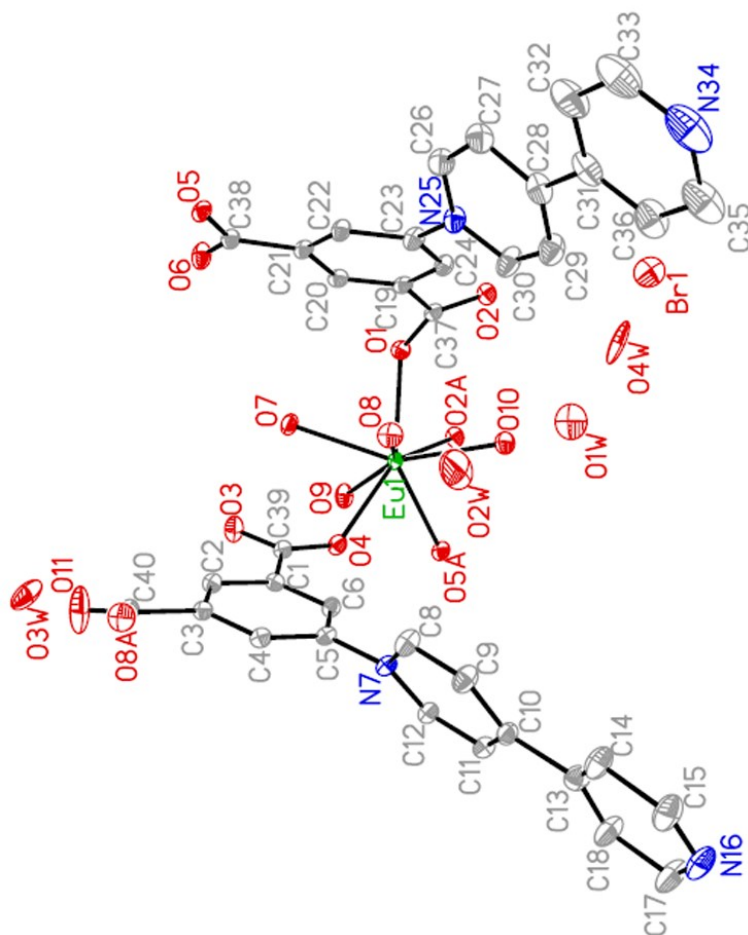

**Fig. S2** The asymmetric unit of **1** showing ellipsoid at the 30% probability level. The hydrogen atoms are omitted for clarity, and some guest water molecules could not be precisely located by using single crystal X-ray crystallography due to its highly disorder.

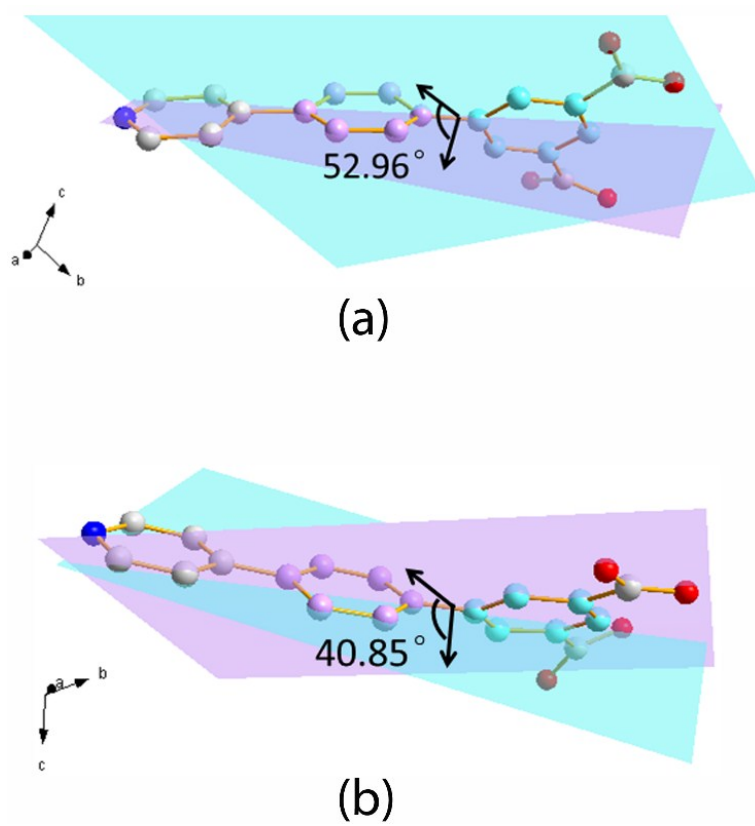

**Fig. S3** The dihedral angles of ipbp<sup>2-</sup> ligand in compound **1** for (a) mode I and (b) mode II.

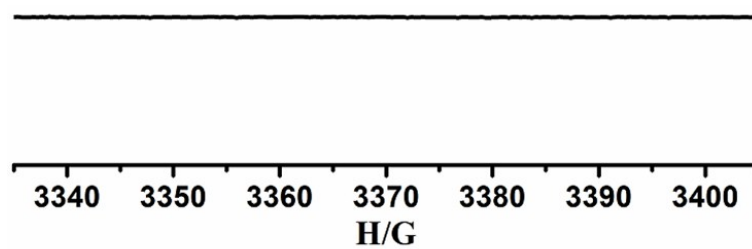

**Fig. S4** EPR signal of pale sample of compound **1**.

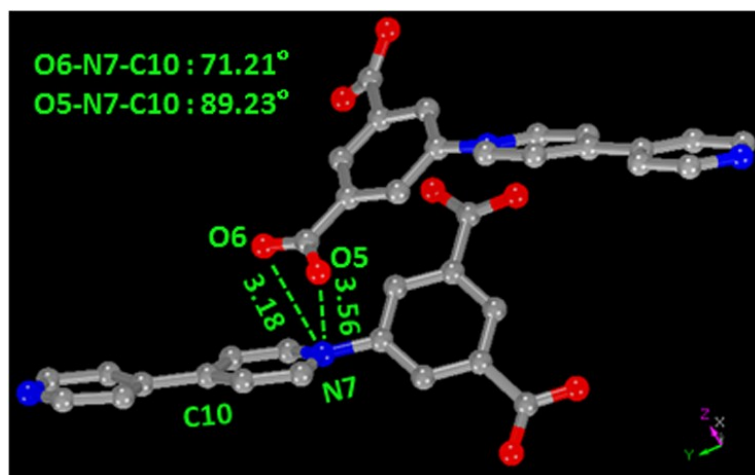

**Fig. S5** The orientations and distances of carboxylate oxygen atoms and pyridinium nitrogen atoms between adjacent ribbons of rings in compound **1**.

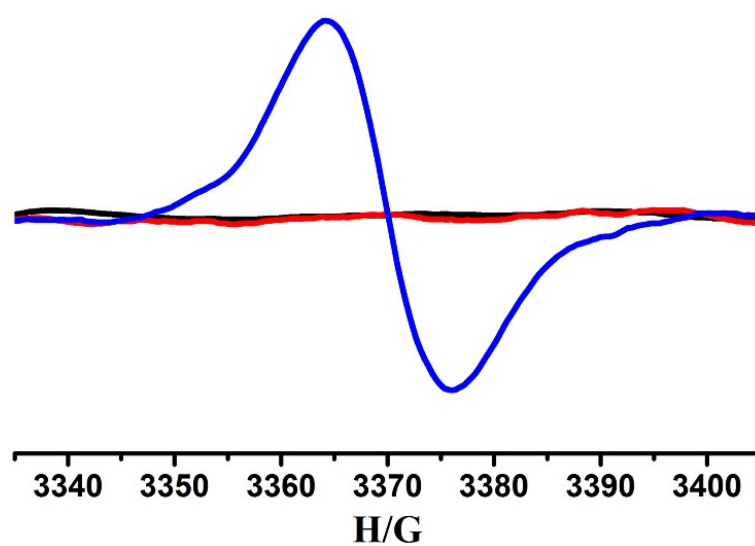

**Fig. S6** EPR signals of **1** after heated in moisture (dark), **1-D** after kept in moisture (red) and in desiccator (blue).

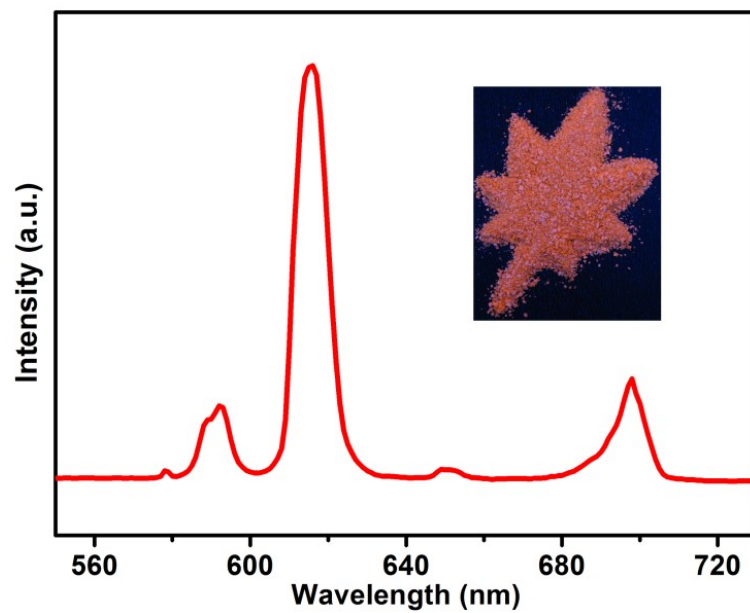

**Fig. S7** Solid-state fluorescent emission spectrum of **1** (the inserted photograph is the sample of **1** under 365 UV light).

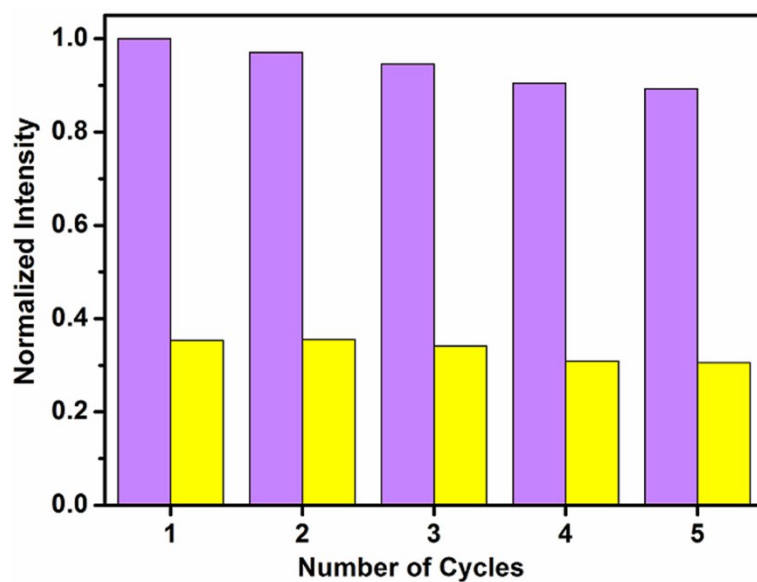

(a)

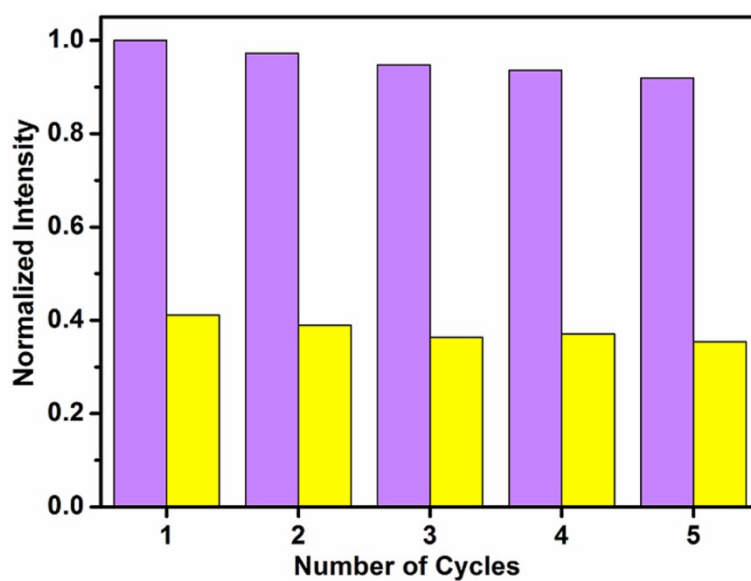

(b)

Fig. S8 The quenching and recovery test of micrometer-sized **1'** (2.5 mg) dispersed in DMF/H<sub>2</sub>O (1.72 ml/0.28 ml) in the presence of (a) Cr<sub>2</sub>O<sub>7</sub><sup>2-</sup> and (b) CrO<sub>4</sub><sup>2-</sup>. The violet bars represent the original fluorescence intensity and yellow bars represent the intensity in the presence of 0.33 mM analyte.

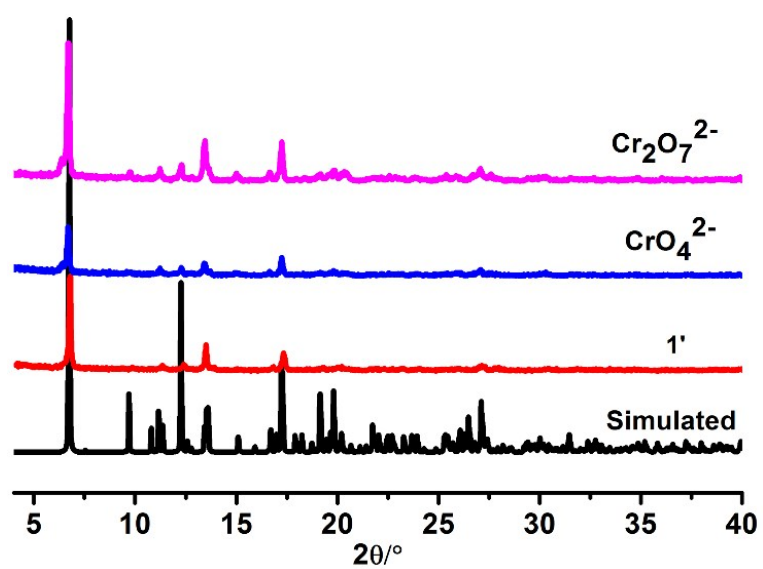

**Fig. S9** Powder XRD patterns of simulated of **1**, experimental of **1'** and **1'** after repeated for five times of sensing  $\text{Cr}_2\text{O}_7^{2-}$  and  $\text{CrO}_4^{2-}$  anions.

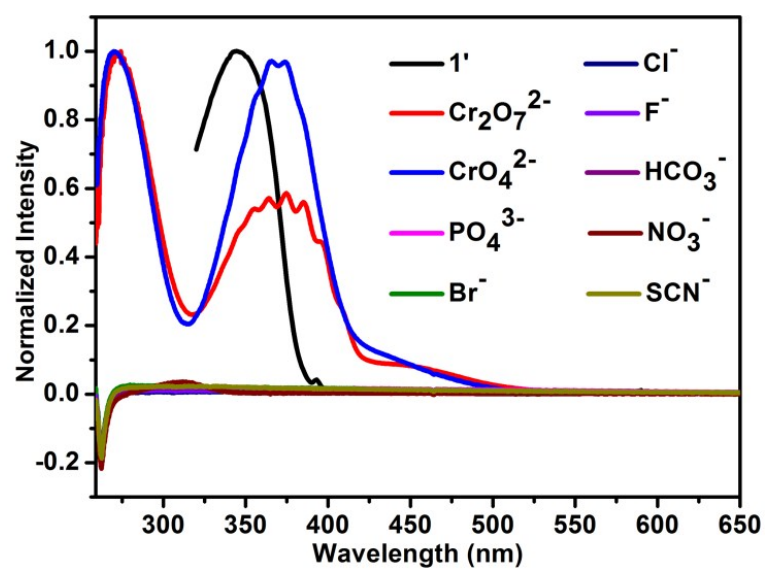

**Fig. S10** Spectral overlap between the absorption spectra of anions and the excitation spectrum of **1'** in DMF/H<sub>2</sub>O.
